# Supplementary material
Source: HighWire-hosted journal article supplement (http://www.cmaj.ca/highwire/filestream/58716/field_highwire_adjunct_files/2/drug-gamble-3-at.pdf)
Supplement: drug-gamble-3-at.pdf [file drug-gamble-3-at.pdf]

**Appendix 3 (as supplied by authors): Agreement between 87 Common Drug Review recommendations and drug plan listing decisions**

|                                                   | <b>BC</b> | <b>AB</b> | <b>SK</b> | <b>MB</b> | <b>ON</b> | <b>NB</b> | <b>NS</b> | <b>PE</b> | <b>NL</b> | <b>NIHB</b> | <b>QC</b> |
|---------------------------------------------------|-----------|-----------|-----------|-----------|-----------|-----------|-----------|-----------|-----------|-------------|-----------|
| <b>No. of Listed Drugs*</b>                       | 29        | 32        | 41        | 17        | 36        | 40        | 36        | 16        | 29        | 31          | 56        |
| <b>Percent agreement (listed vs. not-listed)</b>  | 71.3      | 83.9      | 85.1      | 64.4      | 58.6      | 93.1      | 88.5      | 65.5      | 82.8      | 78.1        | 70.1      |
| <b>Kappa coefficients (listed vs. not-listed)</b> | 0.42      | 0.68      | 0.70      | 0.27      | 0.17      | 0.86      | 0.77      | 0.30      | 0.65      | 0.56        | 0.41      |

Number of listed drugs (full or restricted) based on 87 drugs with a CDR recommendation between May 27, 2005 and May 27, 2009.

Source: IMS Brogan, FAME database
